# Supplementary material
Source: Research Square preprint supplement (doi:10.21203/rs.3.rs-9792573/v1)
Supplement: Supplementary file 1 [file b40d776157b3f346df009655.docx]

**Supplementary information**

**Table S1** Full summary experimental hut results demonstrating the impact of pyrethroid-piperonyl butoxide nets and clothianidin-based indoor residual spraying, applied alone and in combination, against wild, pyrethroid-resistant *Anopheles gambiae* sensu lato in Covè, southern Benin. **For each trial, values in the same column sharing a superscript letter do not differ at the 5% level (i.e. p>0.05) according to regression analysis.*

| **Experimental hut treatment** | ***N* collected** | **% Deterrence**  **[95% CIs]** | ***N* exiting** | **% Exophily**  **[95% CIs]*** | ***N* blood-fed** | **% Blood-feeding***  **[95% CIs]** | **% Blood-feeding inhibition***  **[95% CIs]** | ***N* dead 120 h** | **% Mortality**  **120 h***  **[95% CIs]** | **% Overall killing effect**  **[95% CIs]** |
| --- | --- | --- | --- | --- | --- | --- | --- | --- | --- | --- |
| **Trial 1** | | | | | | | | | | |
| Untreated hut | 1607a | ̶ | 757 | 47.1a [44.7, 49.5] | 1586 | 98.7a [98.1, 99.3] | ̶ | 17 | 1.1a [0.6, 1.6] | – |
| Untreated net | 1327a | 17.4 [10.8, 24.0] | 571 | 43.0a [40.3, 45.7] | 1083 | 81.6b [79.5, 83.7] | 17.3a [14.1, 20.5] | 17 | 1.3a [0.7, 1.9] | 0.0 [-0.7, 0.7] |
| Olyset Plus | 583b | 63.7 [58.0, 69.4] | 474 | 81.3b [78.1, 84.5] | 177 | 30.4c [26.7, 34.1] | 69.2b [65.1, 73.3] | 163 | 28.0b [24.4, 31.6] | 9.1 [7.5, 10.7] |
| SumiShield 50WG IRS | 568b | 64.7 [59.0, 70.4] | 539 | 94.9c [93.1, 96.7] | 554 | 97.5a [96.2, 98.8] | 1.2c [0.0, 3.9] | 241 | 42.4c [38.3, 46.5] | 13.9 [11.9, 15.9] |
| Olyset Plus + SumiShield 50WG IRS | 583b | 63.7 [58.0, 69.4] | 534 | 91.6c [89.3, 93.9] | 199 | 34.1c [30.3, 37.9] | 65.5b [61.4, 69.6] | 305 | 52.3d [48.2, 56.4] | 17.9 [15.7, 20.1] |
| **Trial 2** | | | | | | | | | | |
| Untreated hut | 1258c | ̶ | 567 | 45.1d [42.4, 47.8] | 1249 | 99.3d [98.8, 99.8] | ̶ | 21 | 1.7e [1.0, 2.4] | – |
| Untreated net | 1139c | 9.5 [1.9, 17.1] | 490 | 43.0d [40.1, 45.9] | 951 | 83.5e [81.3, 85.7] | 15.9d [12.7, 19.1] | 21 | 1.8e [1.0, 2.6] | 0.0 [-1.0, 1.0] |
| PermaNet 3.0 | 713d | 43.3 [36.4, 50.2] | 547 | 76.7e [73.6, 79.8] | 244 | 34.2f [30.7, 37.7] | 65.6e [61.7, 19.1] | 256 | 35.9f [32.4, 39.4] | 18.7 [16.1, 21.3] |
| SumiShield 50WG IRS | 842d | 33.1 [26.0, 40.2] | 776 | 92.2e [90.4, 94.0] | 803 | 95.4d [90.4, 96.8] | 3.9f [1.2, 6.6] | 331 | 39.3f [36.0, 42.6] | 24.6 [21.7, 27.5] |
| PermaNet 3.0 + SumiShield 50WG IRS | 722d | 42.6 [35.7, 49.5] | 635 | 88.0e [85.6, 90.4] | 261 | 36.1f [32.6, 39.6] | 63.6e [59.7, 67.5] | 419 | 58.0g [54.4, 61.6] | 31.6 [28.3, 34.9] |
| **Trial 3** | | | | | | | | | | |
| Untreated hut | 1630e | ̶ | 743 | 45.6f [43.2, 48.0] | 1614 | 99.0g [98.5, 99.5] | ̶ | 23 | 1.4h [0.8, 2.0] | – |
| Untreated net | 1487e | 8.8 [2.1, 15.5] | 684 | 46.0f [43.5, 48.5] | 1255 | 84.4h [82.6, 86.2] | 14.7g [11.7, 17.7] | 23 | 1.5h [0.9, 2.1] | 0.0 [-0.8, 0.8] |
| Olyset Plus | 552fg | 66.1 [60.5, 71.7] | 429 | 77.7g [74.2, 81.2] | 150 | 27.2i [23.5, 30.9] | 72.5h [68.5, 76.5] | 173 | 31.3i [27.4, 35.2] | 9.2 [7.5, 10.9] |
| SumiShield 50WG IRS | 956f | 41.3 [35.2, 47.4] | 916 | 95.8h [94.5, 97.1] | 927 | 97.0g [95.9, 98.1] | 2.0i [0.0, 4.5] | 344 | 36.0i [33.0, 39.0] | 19.7 [17.4, 22.0] |
| Olyset Plus + Fludora Fusion IRS | 459g | 71.8 [66.3, 77.3] | 407 | 88.7g [85.8, 91.6] | 72 | 15.7j [12.4, 19.0] | 84.1j [80.3, 87.9] | 290 | 63.2j [58.8, 67.6] | 16.4 [14.3, 18.5] |

**Table S2** Summary results from World Health Organisation tube tests and bottle bioassays characterising the susceptibility of *Anopheles gambiae* sensu lato collected near the experimental hut site in Covè to the active ingredients in the experimental hut treatments. *Mortality ≥98%* *indicates susceptibility at discriminating concentrations (1x).*

| **Test method** | **Insecticide** | **Dose** | ***N* exposed** | ***N* dead 24 h** | **% Mortality 24 h [95% CIs]** |
| --- | --- | --- | --- | --- | --- |
| Tube tests | Silicone oil + acetone (control) | N/A | 100 | 2 | 2.0 [0.0, 4.7] |
| Piperonyl butoxide | 4% | 95 | 4 | 4.2 [0.2, 8.2] |
| Deltamethrin | 0.05% (1x) | 98 | 5 | 5.1 [0.7, 9.5] |
| 0.25% (5x) | 99 | 34 | 34.3 [24.9, 43.7] |
| 0.50% (10x) | 93 | 62 | 66.7 [57.1, 76.3] |
| Piperonyl butoxide + Deltamethrin | 4% + 0.05% | 90 | 57 | 63.3 [53.3, 73.3] |
| Permethrin | 0.75% (1x) | 100 | 3 | 3.0 [0.0, 6.3] |
| 3.75% (5x) | 106 | 48 | 45.3 [35.8, 54.8] |
| 7.50% (10x) | 89 | 60 | 67.4 [57.7, 77.1] |
| Piperonyl butoxide + Permethrin | 4% + 0.75% | 93 | 5 | 5.4 [0.8, 10.0] |
| Bottle bioassays | Acetone + MERO® | N/A + 800 ppm | 100 | 100 | 0 [–, –] |
| Clothianidin + MERO® | 4 µg (1x) + 800 ppm | 100 | 0 | 100 [–, –] |

**Table S3** Summary results from residual efficacy wall cone bioassays conducted with wild, pyrethroid-resistant *Anopheles gambiae* sensu lato collected as larvae from breeding sites near experimental huts in Covè. *At each timepoint, adult mosquitoes aged 3–5 days were exposed to sprayed walls for 30 mins in five batches of 10 to assess the residual efficacy of the indoor residual spraying treatments.*

| **Timepoint** | **Treatment** | **Untreated hut (control)** | **SumiShield® 50WG IRS** | | **Fludora® Fusion IRS** | |
| --- | --- | --- | --- | --- | --- | --- |
| **Replicate hut** | **̶** | **Replicate 1** | **Replicate 2** | **Replicate 1** | **Replicate 2** |
| **1 week** | ***N* exposed** | 54 | 56 | 57 | 56 | 56 |
| ***N* dead 120 h** | 1 | 56 | 57 | 56 | 56 |
| **% Mortality 120 h [95% CIs]** | 1.9 [0.0, 5.5] | 100 [–, –] | 100 [–, –] | 100 [–, –] | 100 [–, –] |
| **1 month** | ***N* exposed** | 56 | 57 | 56 | 56 | 57 |
| ***N* dead 120 h** | 1 | 57 | 56 | 56 | 57 |
| **% Mortality 120 h [95% CIs]** | 1.8 [0.0, 5.3] | 100 [–, –] | 100 [–, –] | 100 [–, –] | 100 [–, –] |
| **2 months** | ***N* exposed** | 52 | 52 | 53 | 53 | 53 |
| ***N* dead 120 h** | 1 | 52 | 53 | 53 | 53 |
| **% Mortality 120 h [95% CIs]** | 1.9 [0.0, 5.6] | 100 [–, –] | 100 [–, –] | 100 [–, –] | 100 [–, –] |
| **3 months** | ***N* exposed** | 54 | 52 | 55 | 53 | 54 |
| ***N* dead 120 h** | 1 | 52 | 55 | 53 | 54 |
| **% Mortality 120 h [95% CIs]** | 1.9 [0.0, 5.5] | 100 [–, –] | 100 [–, –] | 100 [–, –] | 100 [–, –] |
| **4 months** | ***N* exposed** | 52 | 53 | 53 | 54 | 51 |
| ***N* dead 120 h** | 1 | 53 | 53 | 54 | 51 |
| **% Mortality 120 h [95% CIs]** | 1.9 [0.0, 5.6] | 100 [–, –] | 100 [–, –] | 100 [–, –] | 100 [–, –] |
| **5 months** | ***N* exposed** | 51 | 54 | 53 | 54 | 52 |
| ***N* dead 120 h** | 1 | 53 | 53 | 53 | 52 |
| **% Mortality 120 h [95% CIs]** | 2.0 [0.0, 5.8] | 98.1 [94.5, 100] | 100 [–, –] | 98.1 [94.5, 100] | 100 [–, –] |
| **6 months** | ***N* exposed** | 50 | 52 | 51 | 56 | 50 |
| ***N* dead 120 h** | 1 | 51 | 51 | 55 | 50 |
| **% Mortality 120 h [95% CIs]** | 2 [0.0, 5.9] | 98.1 [94.5, 100] | 100 [–, –] | 98.2 [94.7, 100] | 100 [–, –] |

**Table S4** Summary results from interaction bioassays investigating the impact of piperonyl butoxide pre-exposure on the toxicity of clothianidin against wild, pyrethroid-resistant *Anopheles gambiae* sensu lato collected as larvae from breeding sites near experimental huts in Covè. *Adult mosquitoes aged 3–5 days were exposed to filter papers impregnated with various doses of clothianidin either alone or with pre-exposure to the discriminating concentration of piperonyl butoxide.*

| **Treatment** | **Dose** | **N exposed** | **N dead 168 h** | **% Mortality 168 h [95% CIs]** | **% Corrected mortality 168 h [95% CIs]** |
| --- | --- | --- | --- | --- | --- |
| **Distilled water (control)** | **̶** | 200 | 34 | 17.0 [11.8, 22.2] | ̶ |
| **Piperonyl butoxide** | **4%** | 200 | 30 | 15.0 [10.1, 19.9] | ̶ |
| **Clothianidin alone** | **0.025%** | 200 | 99 | 49.5 [42.6, 56.4] | 39.2 [32.0, 46.0] |
| **0.05%** | 200 | 86 | 43.0 [36.1, 49.9] | 31.3 [24.9, 37.7] |
| **0.125%** | 197 | 86 | 43.7 [36.8, 50.6] | 32.2 [25.7, 38.7] |
| **0.25%** | 197 | 108 | 54.8 [47.9, 61.7] | 45.5 [38.5, 52.5] |
| **0.5%** | 198 | 144 | 72.4 [66.2, 78.6] | 66.7 [60.1, 73.3] |
| **Pooled** | 993 | 523 | 52.7 [49.6, 55.8] | 43.0 [39.9, 46.1] |
| **Clothianidin with piperonyl butoxide**  **pre-exposure** | **4% + 0.025%** | 192 | 115 | 59.9 [53.0, 66.8] | 51.7 [44.6, 58.8] |
| **4% + 0.05%** | 199 | 132 | 66.3 [59.7, 72.9] | 59.4 [52.6, 66.2] |
| **4% + 0.125%** | 197 | 121 | 61.4 [54.6, 68.2] | 53.5 [46.5, 60.5] |
| **4% + 0.25%** | 199 | 128 | 64.3 [57.6, 71.0] | 57.0 [50.1, 63.9] |
| **4% + 0.5%** | 197 | 149 | 75.6 [69.6, 81.6] | 70.6 [64.2, 77.0] |
| **Pooled** | 984 | 645 | 65.5 [62.6, 68.5] | 58.5 [62.5, 68.6] |
